# Supplementary material
Source: Springer Nature journal article supplement (https://www.springermedizin.de/resource/supplementary/13075_2011_3586_MOESM5_ESM.pdf/9694834)

**A**

Fresh CD4 T cells (HD)

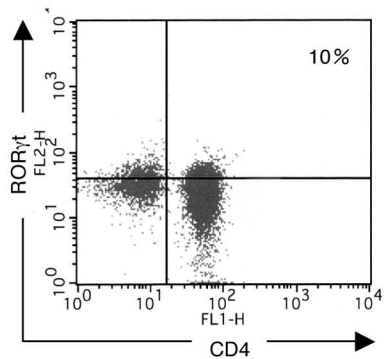

Fresh CD4 T cells (BD)

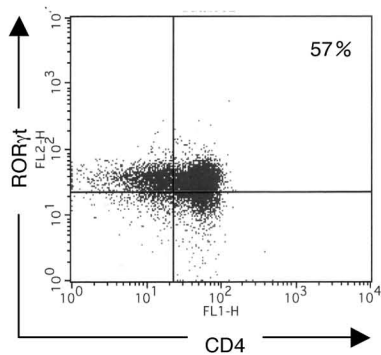

Fresh CD4 T cells (IFX-treated BD)

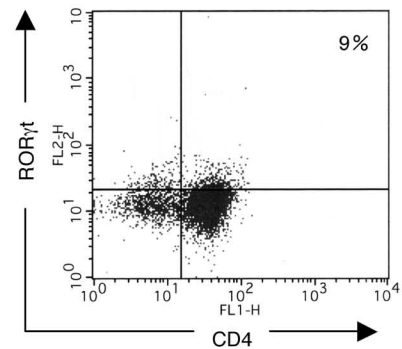**B**

Th17 cell lines (HD)

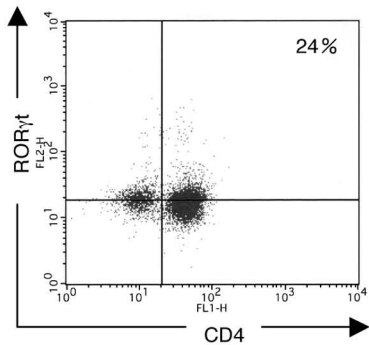

Th17 cell lines (BD)

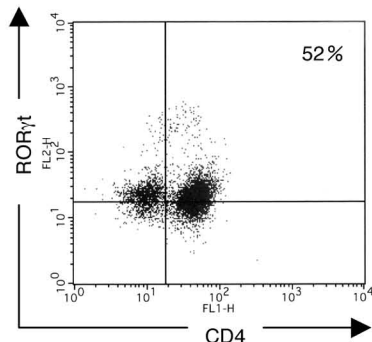

IFX-treated Th17 cell lines (BD)

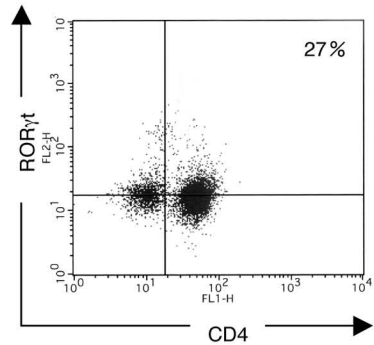

Supplement: MOESM5 [file 9694834]
